# Supplementary material for: Bimodal Activation of Different Neuron Classes with the Spectrally Red-Shifted Channelrhodopsin Chimera C1V1 in Caenorhabditis elegans
Source: PLOS journal article supplement (doi:10.1371/journal.pone.0046827), 2012-10-03

Figure S6

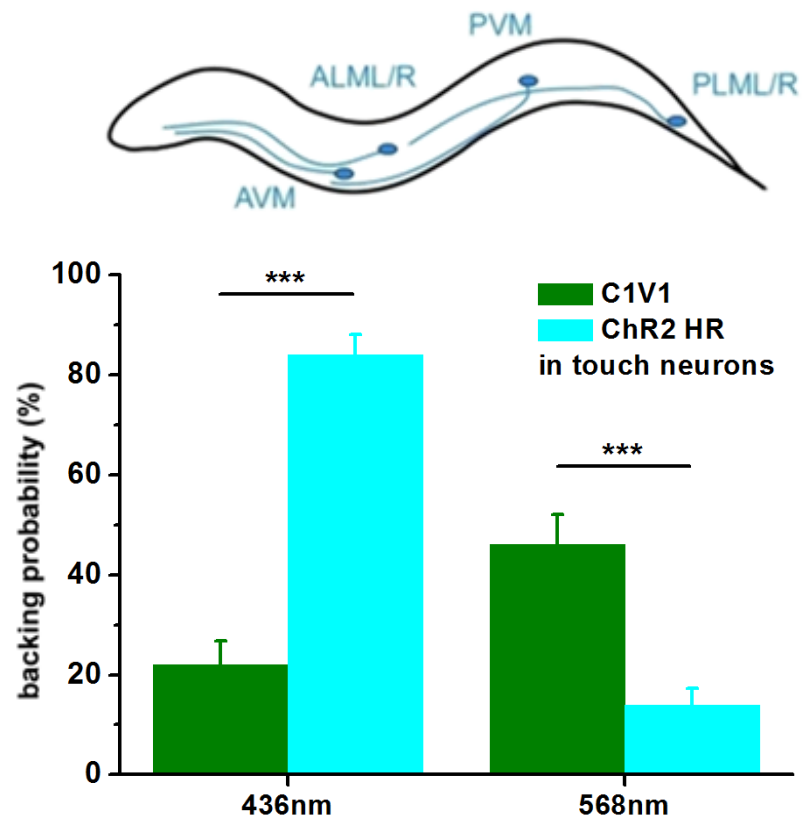

Supplement: S6 (10.1371/journal.pone.0046827.s006) [file journal.pone.0046827.s006]
